# Supplementary material for: Scaling-up CO 2 -selective graphene oxide membranes via sequential coating with gelated graphene oxide and polyethyleneimine for CO 2 separation
Source: Royal Society of Chemistry journal article supplement (doi:10.1039/d4en00357h), 2024-01-01
Supplement: d4en00357h1.pdf [file d4en00357h1.pdf]

## Supplementary materials for

# **Scaling-up CO<sub>2</sub>-selective Graphene Oxide Membranes via Sequential Coating with Gelated Graphene Oxide and Polyethyleneimine for CO<sub>2</sub> Separation**

Hobin Jee, Ishaq Ahmad, Chan Woo Park, Seung Hyun Song, Changhyuk Kim, Sukbyung Chae, Chong Yang Chuah, Sang Yong Nam, Kyu-Jung Chae, Kunli Goh\*, Euntae Yang\*

\*Corresponding author: yet83@gnu.ac.kr (Euntae Yang); [gohkunli@ntu.edu.sg](mailto:gohkunli@ntu.edu.sg) (Kunli Goh)

This file includes:

Fig. S1

Table S1

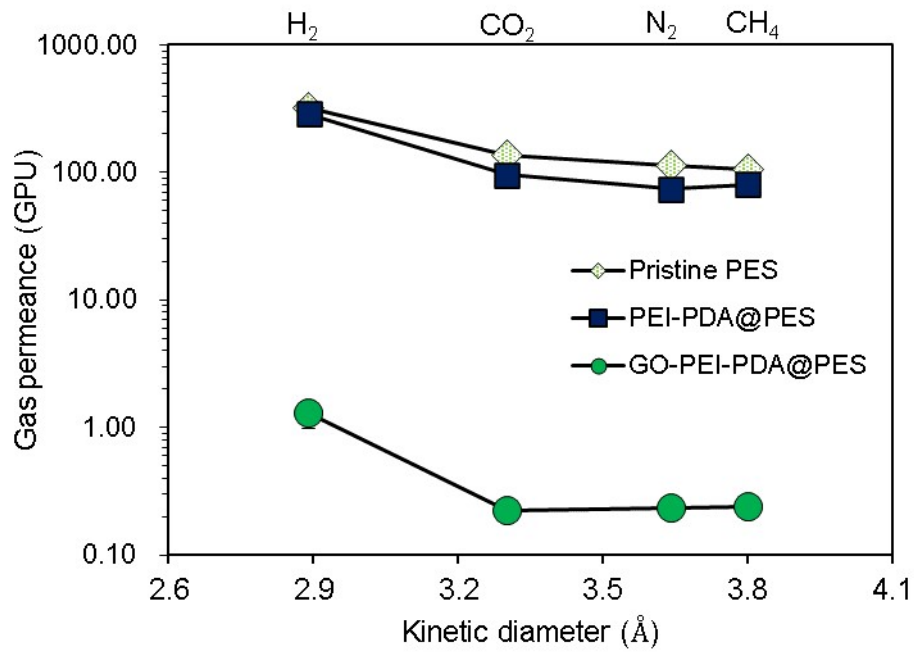

**Fig. S1.** Gas permeance of Pristine PES and modified membranes.

**Table S1.** The raw data of permeability and selectivity of membranes.

| Membrane           | Conditions |                    | P <sub>H2</sub> | P <sub>CO2</sub> | P <sub>N2</sub> | P <sub>CH4</sub> | S <sub>CO2/H2</sub> | S <sub>CO2/CH4</sub> | S <sub>CO2/N2</sub> |
|--------------------|------------|--------------------|-----------------|------------------|-----------------|------------------|---------------------|----------------------|---------------------|
| PES                | Dry        | Average            | 319.72          | 135.40           | 112.43          | 104.62           |                     |                      |                     |
|                    |            | Standard deviation | 11.19           | 13.70            | 10.54           | 19.48            |                     |                      |                     |
| PEI-PDA@PES        | Dry        | Average            | 289.12          | 95.40            | 74.48           | 80.54            |                     |                      |                     |
|                    |            | Standard deviation | 18.89           | 14.60            | 13.03           | 9.01             |                     |                      |                     |
|                    | Wet        | Average            | 7.40            | 6.08             | 3.68            | 3.78             | 0.79                | 1.59                 | 1.63                |
|                    |            | Standard deviation | 0.27            | 0.40             | 0.28            | 0.29             | 0.03                | 0.04                 | 0.04                |
| GO-PEI-PDA@PES     | Dry        | Average            | 1.29            | 0.22             | 0.23            | 0.24             |                     |                      |                     |
|                    |            | Standard deviation | 0.30            | 0.02             | 0.04            | 0.01             |                     |                      |                     |
|                    | Wet        | Average            | 1.36            | 3.80             | 0.13            | 0.22             | 2.94                | 22.26                | 41.06               |
|                    |            | Standard deviation | 0.30            | 0.02             | 0.04            | 0.01             | 0.18                | 2.79                 | 4.94                |
| PEI-GO-PEI-PDA@PES | Dry        | Average            | 62.56           | 10.86            | 14.28           | 14.15            |                     |                      |                     |
|                    |            | Standard deviation | 2.01            | 0.41             | 0.66            | 1.90             |                     |                      |                     |
|                    | Wet        | Average            | 0.59            | 2.30             | 0.04            | 0.08             | 3.91                | 29.58                | 54.25               |
|                    |            | Standard deviation | 0.08            | 0.25             | 0.01            | 0.00             | 0.70                | 4.82                 | 10.81               |
